# Supplementary material
Source: Elsevier journal article supplement (https://www.sciencedirect.com/science/article/pii/S1885585720303613)
Supplement: mmc1 [file S1885585720303613:mmc1.pdf]

## Impact of sex differences and network systems on the in-hospital mortality of patients with ST-segment elevation acute myocardial infarction

### Supplementary data

**Table 1 of the supplementary data.** Demographic and clinical variables independently associated with primary percutaneous coronary intervention performance

|                                                                                                                                   | Odds ratio | P      | 95%CI     |
|-----------------------------------------------------------------------------------------------------------------------------------|------------|--------|-----------|
| Female sex                                                                                                                        | 0.69       | < .001 | 0.68-0.70 |
| Age                                                                                                                               | 0.96       | < .001 | 0.96-0.96 |
| DM or DM complications, except proliferative retinopathy (CC 15-20, 120)                                                          | 0.93       | < .001 | 0.91-0.95 |
| Vascular disease and complications (CC 104-105)                                                                                   | 0.48       | .00    | 0.40-0.58 |
| Renal failure (CC 131)                                                                                                            | 0.84       | < .001 | 0.82-0.86 |
| Stroke (CC 95-96)                                                                                                                 | 0.66       | < .001 | 0.61-0.72 |
| Anterior myocardial infarction (ICD-9-CM codes 410.01, 410.11)                                                                    | 1.43       | < .001 | 1.37-1.49 |
| Cardiorespiratory failure or shock (CC 79 without cardiogenic shock [ICD-9-CM code 785.51])                                       | 0.93       | < .001 | 0.91-0.96 |
| Congestive heart failure (CC 80)                                                                                                  | 0.74       | < .001 | 0.73-0.75 |
| Cardiogenic shock (ICD-9-CM code 785.51)                                                                                          | 0.94       | < .001 | 0.91-0.98 |
| Mechanical complications (ICD-9-CM code 423.3 without 996.03, 996.70-996.79, and 998.2 in the same episode; 429.71; 429.6; 429.5) | 0.71       | < .001 | 0.61-0.83 |
| Pneumonia (CC 111-113)                                                                                                            | 0.71       | < .001 | 0.69-0.74 |
| Dementia or other specified brain disorders (CC 49-50)                                                                            | 0.38       | < .001 | 0.37-0.40 |
| Hemiplegia, paraplegia, paralysis, and functional disability (CC 67-69, 100-102, 177-178)                                         | 0.57       | < .001 | 0.54-0.60 |
| Metastatic cancer, acute leukemia, and other severe cancers (CC 7, 8)                                                             | 0.45       | .00    | 0.42-0.49 |

AUROC, area under the curve: 0.72 (95%CI, 0.71-0.73); CC, Condition Category; DM, diabetes mellitus.

Comorbidities were extracted from the database using International Classification of Diseases, Ninth Edition, Clinical Modification codes (reference 15 of the main text, and see below).

**Table 2 of the supplementary data**

| Age group    | % pPCI performed in men* | % pPCI performed in women* | P      |
|--------------|--------------------------|----------------------------|--------|
| 18-34 y      | 52.8                     | 55.5                       | .422   |
| 35-44 y      | 61.8                     | 56.5                       | < .001 |
| 45-54 y      | 63.2                     | 57.8                       | < .001 |
| 55-64 y      | 60.7                     | 54.7                       | < .001 |
| 65-74 y      | 54.5                     | 48.6                       | < .001 |
| 75-84 y      | 42.6                     | 35.3                       | < .001 |
| 85-94 y      | 21.6                     | 14.5                       | < .001 |
| > 95 y       | 8.0                      | 4.0                        | < .001 |
| <b>Total</b> | 53.5                     | 37.0                       | < .001 |

pPCI, primary percutaneous coronary intervention.

\* Primary percutaneous coronary intervention was considered to have been performed when PCI codes were not accompanied by thrombolysis codes in the same episode.

**Table 3 of the supplementary data**

| Age groups | Odds ratio (women vs men) | 95%CI     |
|------------|---------------------------|-----------|
| < 45 y     | 1.42                      | 1.02-1.98 |
| 45-54 y    | 1.51                      | 1.26-1.82 |
| 55-64 y    | 1.38                      | 1.22-1.56 |
| 65-74 y    | 1.27                      | 1.18-1.37 |
| 75-84 y    | 1.28                      | 1.22-1.34 |
| 85-94 y    | 1.15                      | 1.09-1.22 |
| > 94 y     | 1.07                      | 0.87-1.33 |

**Figure 1 of the supplementary data.** AUROC, area under the ROC curve; ROC, receiver operating characteristics.

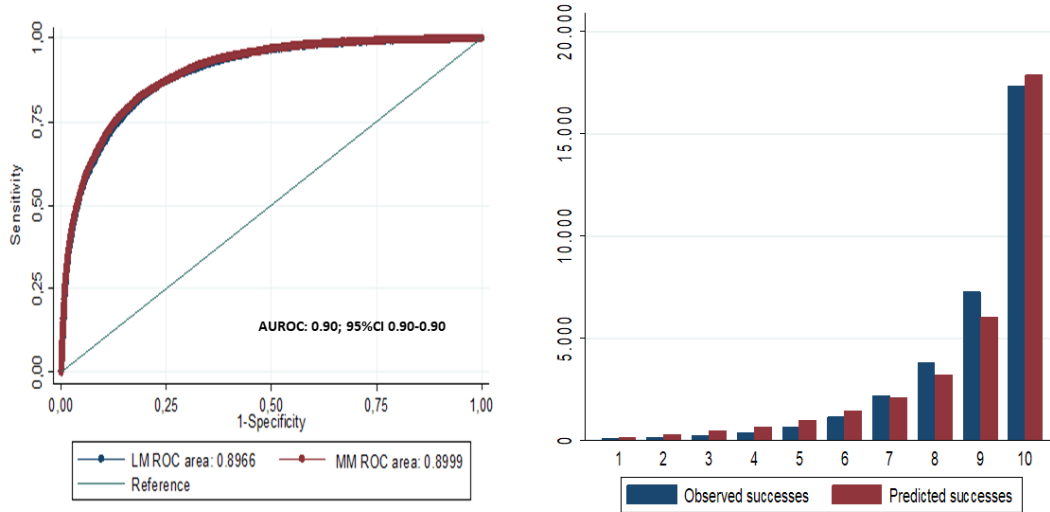

**Figure 2 of the supplementary data.** AUROC, area under the ROC curve; ROC, receiver operating characteristics.

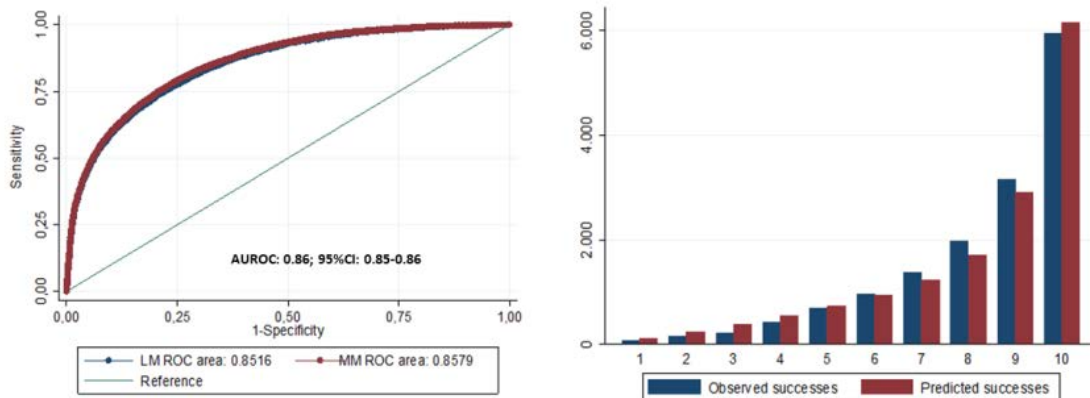

## REFERENCES

References cited in this supplementary data, with the citation number of the main text reference list.

15. Yale New Haven Health Services Corporation/Center for Outcomes Research & Evaluation (YNHHSC/CORE). Centers for Medicare & Medicaid Services (CMS). Chronic Obstructive Pulmonary Disease – Version 5.0 Heart Failure – Version 10.0 Pneumonia – Version 10.0 Stroke – Version 5.0. 2016. Available at: [https://www.qualitynet.org/files/5d0d3a84764be766b01046af?filename=2016\\_Meas\\_Updts%26Spec\\_Resrc.zip](https://www.qualitynet.org/files/5d0d3a84764be766b01046af?filename=2016_Meas_Updts%26Spec_Resrc.zip). Accessed 9 Jul 2020.
